# Supplementary material for: Synthesis of a Pt3Sn catalyst using a solvothermal method assisted by deep eutectic solvents for selective hydrogenation of furfural to furfuryl alcohol
Source: Royal Society of Chemistry journal article supplement (doi:10.1039/d3qi01229h), 2023-01-01
Supplement: d3qi01229h1.pdf [file d3qi01229h1.pdf]

# Synthesis of Pt<sub>3</sub>Sn Catalyst Using Solvothermal Method Assisted by Deep Eutectic Solvents for Selective Hydrogenation of Furfural to Furfuryl Alcohol

*Ruonan Wang<sup>a</sup>, Xuran Ma<sup>a</sup>, Dairui Ding<sup>a</sup>, Bowen Huang<sup>\*b</sup>, Zhiguo Zhu<sup>a</sup>, Ting Su<sup>a</sup>,  
Weiping Liao<sup>a</sup>, Hongying Lü<sup>\*a</sup>, Kaixuan Yang<sup>\*a</sup>*

<sup>a</sup>College of Chemistry and Chemical Engineering, Yantai University, Yantai 264005,  
P. R. China

<sup>b</sup>College of Materials Science and Engineering, Hunan University, Changsha 410082,  
P.R. China

\*To whom correspondence should be addressed: Email: yangkaixuanyt@ytu.edu.cn;  
hylv@ytu.edu.cn

## Table of contents

**Table S1.** Physicochemical properties of Pt-Sn catalysts with different synthesis temperature

**Table S2.** Physicochemical properties of Pt-Sn catalysts with different Pt/Sn ratio

**Table S3.** The calculated charge transfers between Pd and Sn in Pt<sub>3</sub>Sn unit cell.

**Table S4.** FAL hydrogenation to FOL over different Pt-Sn catalysts.

**Table S5.** Calculated  $k$  of FAL hydrogenation over Pt/CNTs and PtSn<sub>0.5</sub>/CNTs-100 under different temperature.

**Scheme S1.** Proposed adsorption mechanism of FAL and H<sub>2</sub> on different catalysts.

**Fig. S1.** (a) N<sub>2</sub> adsorption and desorption isotherm of Pt-Sn catalysts with (a) different synthesis temperature and (b) Pt/Sn ratio.

**Fig. S2.** SEM image and the corresponding elemental EDX mapping of PtSn<sub>0.2</sub>/CNTs-100

**Fig. S3.** SEM image and the corresponding elemental EDX mapping of PtSn<sub>0.33</sub>/CNTs-100

**Fig. S4.** SEM image and the corresponding elemental EDX mapping of PtSn<sub>0.5</sub>/CNTs-100

**Fig. S5.** SEM image and the corresponding elemental EDX mapping of PtSn<sub>1.0</sub>/CNTs-100

**Fig. S6.** SEM image and the corresponding elemental EDX mapping of PtSn<sub>2.0</sub>/CNTs-100

**Fig. S7.** (a) STEM image and (b) TEM image of Pt/CNTs. The inset images correspond

to the particle size distribution of catalyst and lattice fringe of Pt, respectively.

**Fig. S8.** (a) STEM image and (b) the particle size distribution of Pt/CNTs-IM.

**Fig. S9.** Variation of conversion and selectivity with reaction time for the hydrogenation of FAL over (a) PtSn<sub>0.5</sub>/CNTs-60, (b) PtSn<sub>0.5</sub>/CNTs-80, (c) PtSn<sub>0.5</sub>/CNTs-100, (d) PtSn<sub>0.5</sub>/CNTs-140, (e) PtSn<sub>0.5</sub>/CNTs-180. Reaction condition: 140 °C, 2 MPa, 1 h, THF as solvent, and 50 mg catalyst.

**Fig. S10.** Variation of conversion and selectivity with reaction time for the hydrogenation of FAL over (a) Pt/CNTs, (b) PtSn<sub>0.2</sub>/CNTs-100, (c) PtSn<sub>0.33</sub>/CNTs-100, (d) PtSn<sub>0.5</sub>/CNTs-100, (e) PtSn<sub>1.0</sub>/CNTs-100, (f) PtSn<sub>2.0</sub>/CNTs-100. Reaction condition: 140 °C, 2 MPa, 1 h, THF as solvent, and 50 mg catalyst.

**Fig. S11.** STEM images of PtSn<sub>0.5</sub>/CNTs-60, PtSn<sub>0.5</sub>/CNTs-140, and PtSn<sub>0.5</sub>/CNTs-180. The inset images correspond to the particle size distribution.

**Fig. S12.** Fitting of the pseudo-first-order kinetic model to the hydrogenation of FAL experimental datas collected over (a) PtSn<sub>0.5</sub>/CNTs-100 and (b) Pt/CNTs.

**Fig. S13.** Stability test over PtSn<sub>0.5</sub>/CNTs-100 with low FAL conversion. Reaction conditions: 0.05 g catalyst, 80 °C, 2 MPa, H<sub>2</sub>O as solvent, and 50 min.

**Fig. S14.** SEM image and the corresponding elemental EDX mapping of spent PtSn<sub>2.0</sub>/CNTs-100

**Table S1.** Physicochemical properties of Pt-Sn catalysts with different synthesis

| Samples                       | S <sub>BET</sub> (m <sup>2</sup> /g) |
|-------------------------------|--------------------------------------|
| PtSn <sub>0.5</sub> /CNTs-60  | 146.6                                |
| PtSn <sub>0.5</sub> /CNTs-80  | 148.5                                |
| PtSn <sub>0.5</sub> /CNTs-100 | 142.1                                |
| PtSn <sub>0.5</sub> /CNTs-140 | 135.4                                |
| PtSn <sub>0.5</sub> /CNTs-180 | 143.1                                |

temperature

**Table S2.** Physicochemical properties of Pt-Sn catalysts with different Pt/Sn ratio

| Samples                       | S <sub>BET</sub> (m <sup>2</sup> /g) |
|-------------------------------|--------------------------------------|
| CNT                           | 144.5                                |
| Pt/CNTs                       | 147.3                                |
| PtSn <sub>0.2</sub> /CNTs-100 | 142.4                                |
| PtSn <sub>0.5</sub> /CNTs-100 | 142.1                                |
| PtSn <sub>1.0</sub> /CNTs-100 | 138.4                                |
| PtSn <sub>2.0</sub> /CNTs-100 | 120.9                                |

**Table S3.** The calculated charge transfers between Pd and Sn in Pt<sub>3</sub>Sn unit cell.

| Atom                             | Pt(1) | Pt(2) | Pt(3) | Sn(1)  |
|----------------------------------|-------|-------|-------|--------|
| Charge transfer (e) <sup>a</sup> | 0.413 | 0.326 | 0.470 | -1.209 |

a. “-” means getting electrons

**Table S4.** FAL hydrogenation to FOL over different Pt-Sn catalysts.

| Entry | Catalyst                                     | T (°C) | Time (h)       | Pressure (MPa) | Con. (%) | Sel. (%) | Ref.      |
|-------|----------------------------------------------|--------|----------------|----------------|----------|----------|-----------|
| 1     | Pt-Sn/SiO <sub>2</sub>                       | 100    | 5              | 20             | 47       | 100      | [1]       |
| 2     | Pt-Sn@mSiO <sub>2</sub>                      | 160    | - <sup>a</sup> | 1              | 99       | 97       | [2]       |
| 3     | PtSn <sub>0.2</sub> /SiO <sub>2</sub>        | 100    | 8              | 10             | 100      | 96       | [3]       |
| 4     | PtSn <sub>0.8</sub> /SiO <sub>2</sub>        | 100    | 8              | 10             | 71       | 98       | [3]       |
| 5     | Pt <sub>1</sub> Sn <sub>0.3</sub> /HMSNs     | 100    | 5              | 10             | 99       | 98       | [4]       |
| 6     | Pt-Sn/SiO <sub>2</sub>                       | 100    | 5              | 20             | 63       | 99       | [5]       |
| 7     | PtSn <sub>0.10</sub> @UiO-66-NH <sub>2</sub> | 160    | 10             | -              | 60       | 98       | [6]       |
| 8     | PtSn <sub>0.5</sub> /CNTs-100                | 80     | 6              | 20             | >99      | >99      | This work |

<sup>a</sup> performed in a fixed-bed reactor.

**Table S5.** Calculated  $k$  of FAL hydrogenation over Pt/CNTs-100 and PtSn<sub>0.5</sub>/CNTs-100 under different temperature.

| Catalyst                      | T/K    | k(min <sup>-1</sup> ) | R <sup>2</sup> |
|-------------------------------|--------|-----------------------|----------------|
| Pt/CNTs-100                   | 313.15 | 0.00072               | 0.99           |
|                               | 323.15 | 0.00119               | 0.99           |
|                               | 333.15 | 0.00172               | 0.99           |
|                               | 353.15 | 0.00313               | 0.99           |
| PtSn <sub>0.5</sub> /CNTs-100 | 313.15 | 0.000904              | 0.99           |
|                               | 323.15 | 0.001418              | 0.99           |
|                               | 333.15 | 0.001812              | 0.99           |
|                               | 353.15 | 0.002997              | 0.98           |



**Table S6.** Hydrogenation of FAL over different catalysts.

| Entry | Con.% <sup>a</sup> | Sel.% <sup>a</sup> |       |      |        |                                |
|-------|--------------------|--------------------|-------|------|--------|--------------------------------|
|       |                    | FOL                | THFOL | 2-MF | 2-MTHF | Unknown chemicals <sup>b</sup> |
| 1     | 96.9               | 99.4               | 0     | 0    | 0      | 0.6                            |
| 2     | 95.9               | 97.9               | 1.2   | 0    | 0      | 0.9                            |
| 3     | 95.9               | 96.1               | 2.7   | 0    | 0      | 1.2                            |
| 4     | 95.5               | 95.7               | 2.9   | 0.6  | 0      | 0.8                            |
| 5     | 96.9               | 94.3               | 3.8   | 1.2  | 0      | 0.7                            |
| 6     | 94.9               | 91.2               | 4.7   | 2.2  | 0      | 1.9                            |
| 7     | 96.0               | 91.7               | 5.5   | 1.4  | 0      | 1.4                            |
| 8     | 94.0               | 90.4               | 6.3   | 2.3  | 0      | 1.0                            |
| 9     | 92.9               | 90.6               | 6.4   | 1.2  | 0      | 1.8                            |
| 10    | 91.7               | 86.9               | 9.6   | 1.5  | 0      | 2.0                            |

<sup>a</sup>Reaction conditions: 80 °C, 2 MPa, 4 h, 50 mg catalyst, and H<sub>2</sub>O as solvent. <sup>b</sup>Calculated by carbon balance.

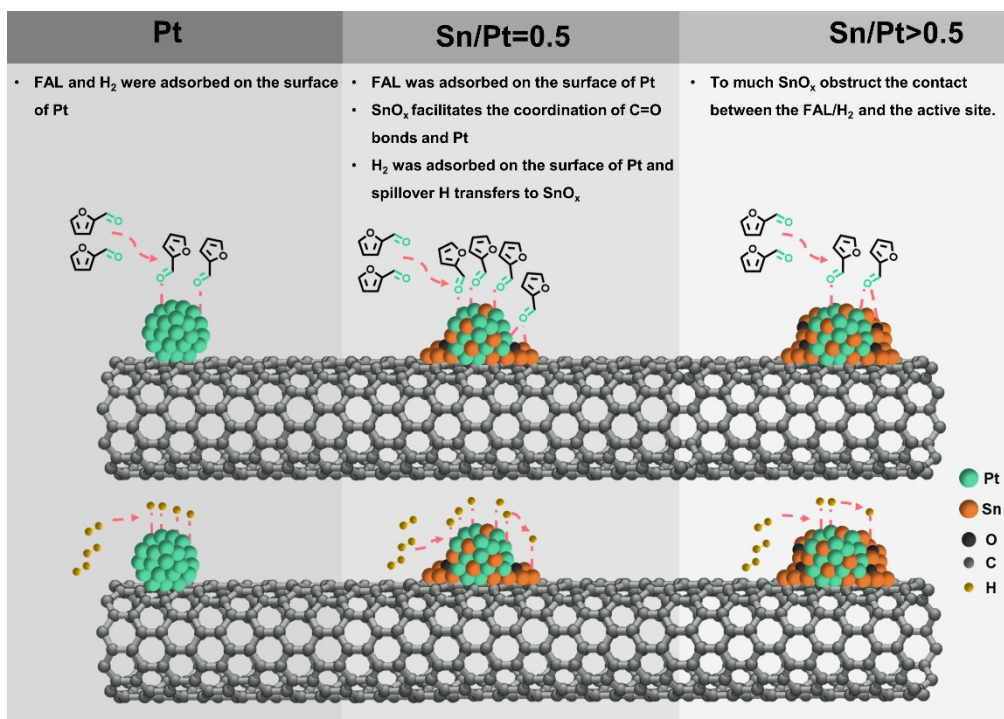

**Scheme S1.** Proposed adsorption mechanism of FAL and H<sub>2</sub> over different catalysts.

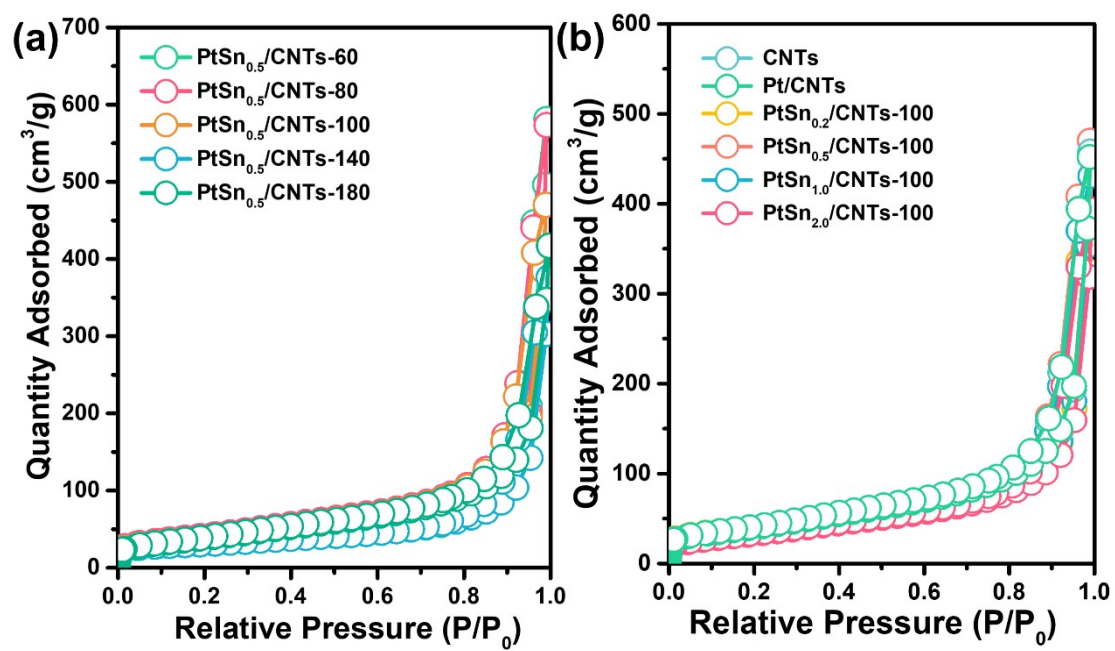

**Fig. S1** (a) N<sub>2</sub> adsorption and desorption isotherm of Pt-Sn catalysts with (a) different synthesis temperature and (b) Pt/Sn ratio.

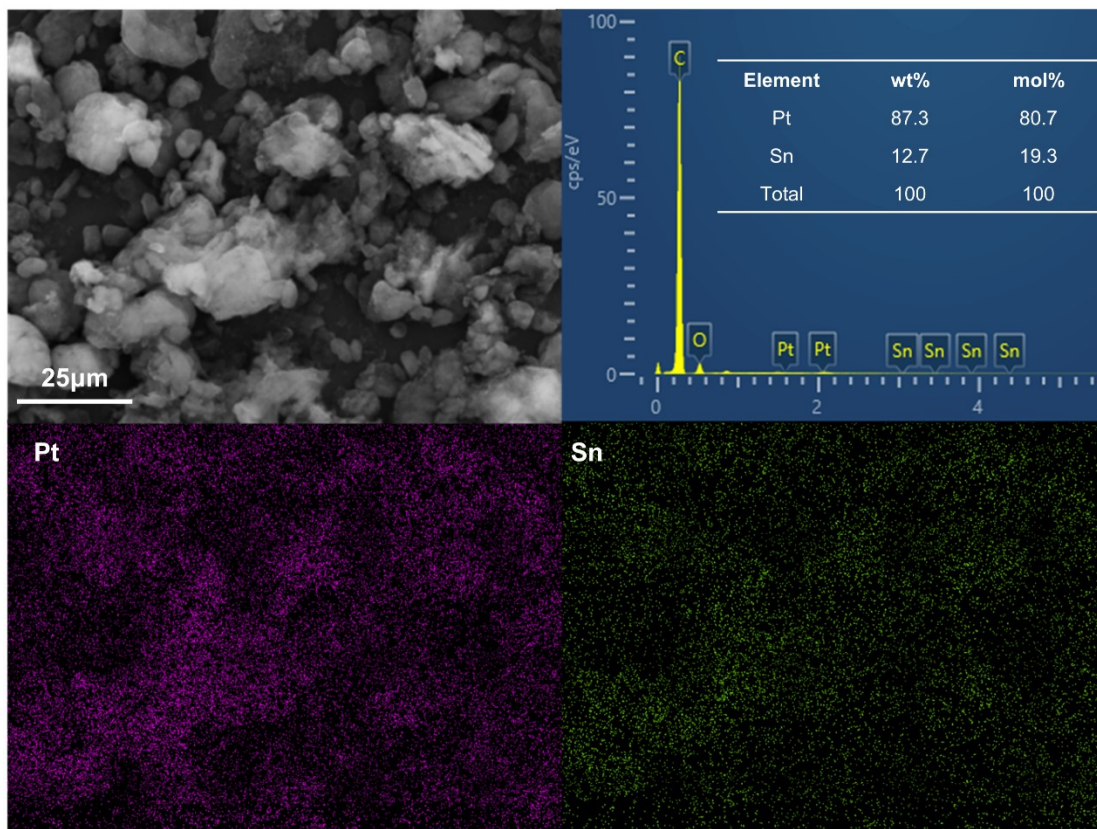

**Fig. S2** SEM image and the corresponding elemental EDX mapping of PtSn<sub>0.2</sub>/CNTs-

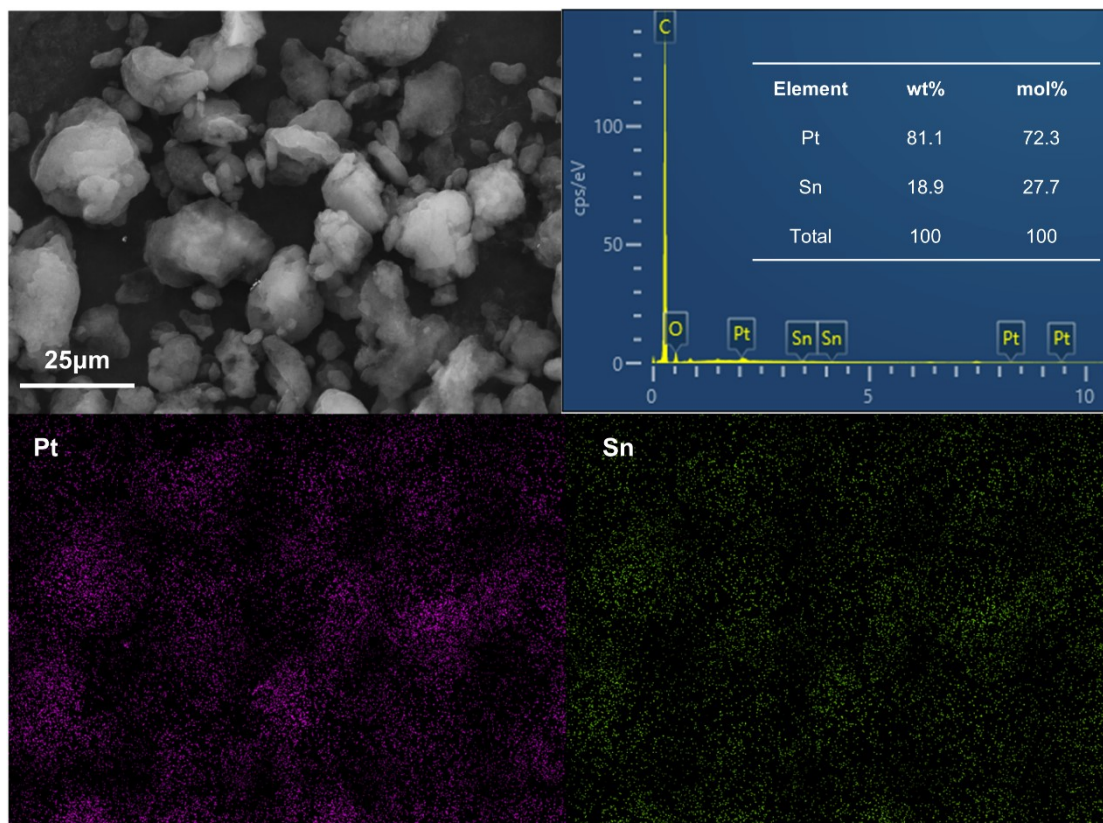

**Fig. S3** SEM image and the corresponding elemental EDX mapping of PtSn<sub>0.33</sub>/CNTs-

100

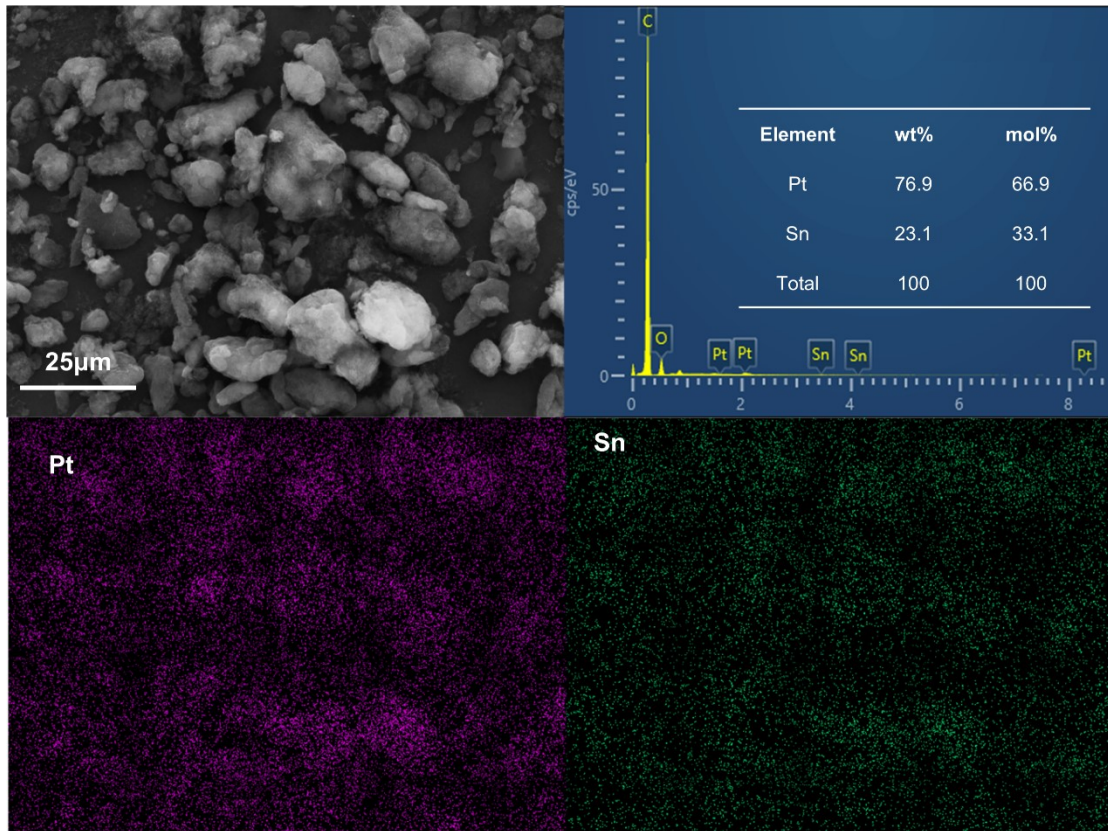

**Fig. S4** SEM image and the corresponding elemental EDX mapping of PtSn<sub>0.5</sub>/CNTs-

100

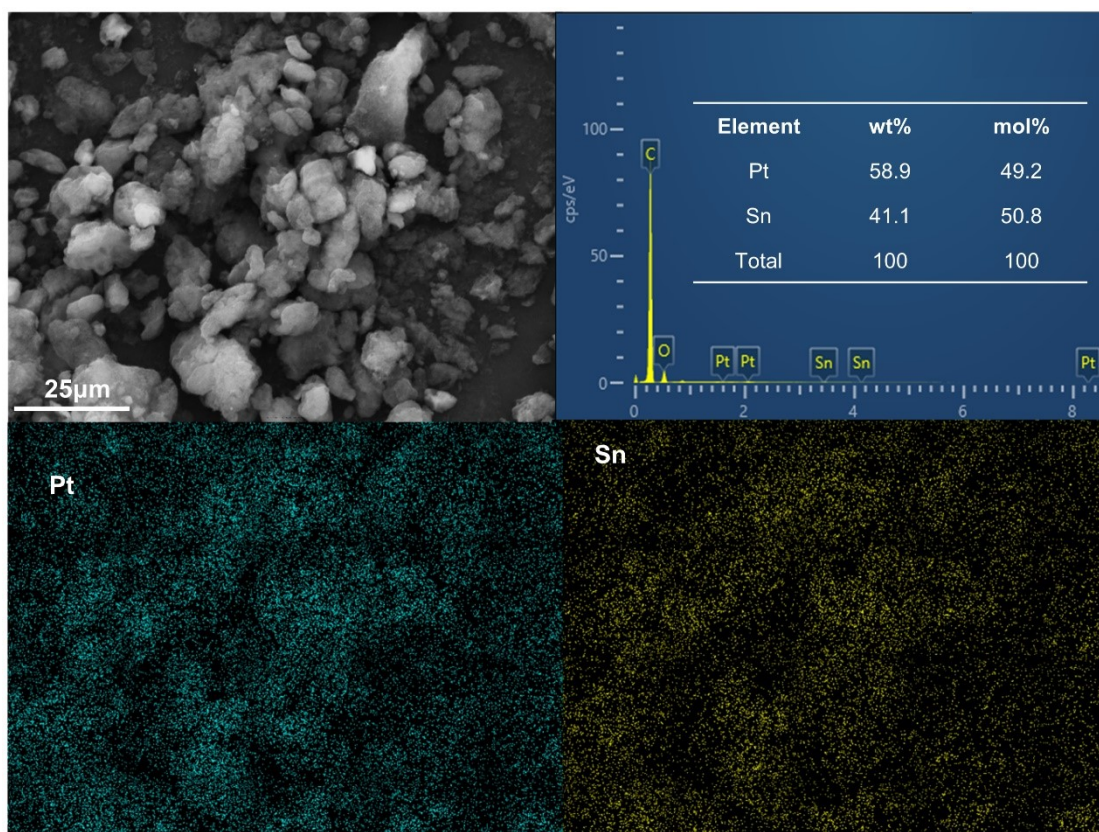

**Fig. S5** SEM image and the corresponding elemental EDX mapping of PtSn<sub>1.0</sub>/CNTs-

100

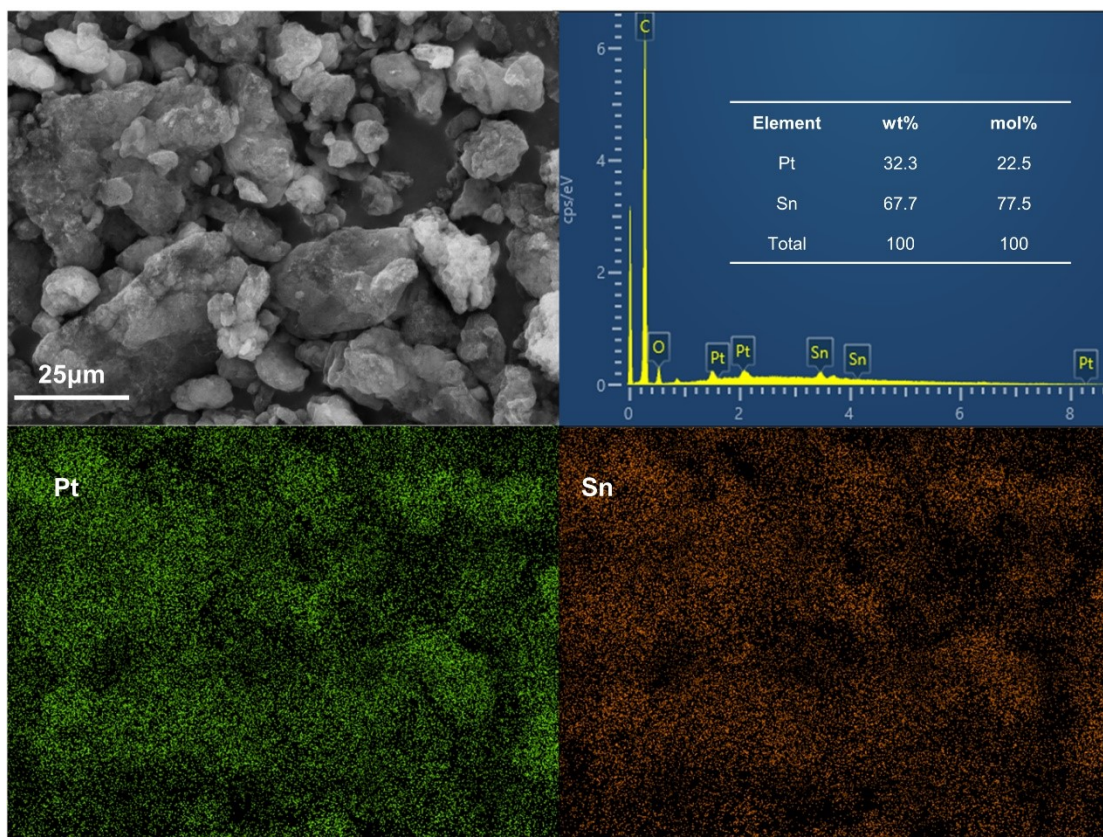

**Fig. S6** SEM image and the corresponding elemental EDX mapping of PtSn<sub>2.0</sub>/CNTs-



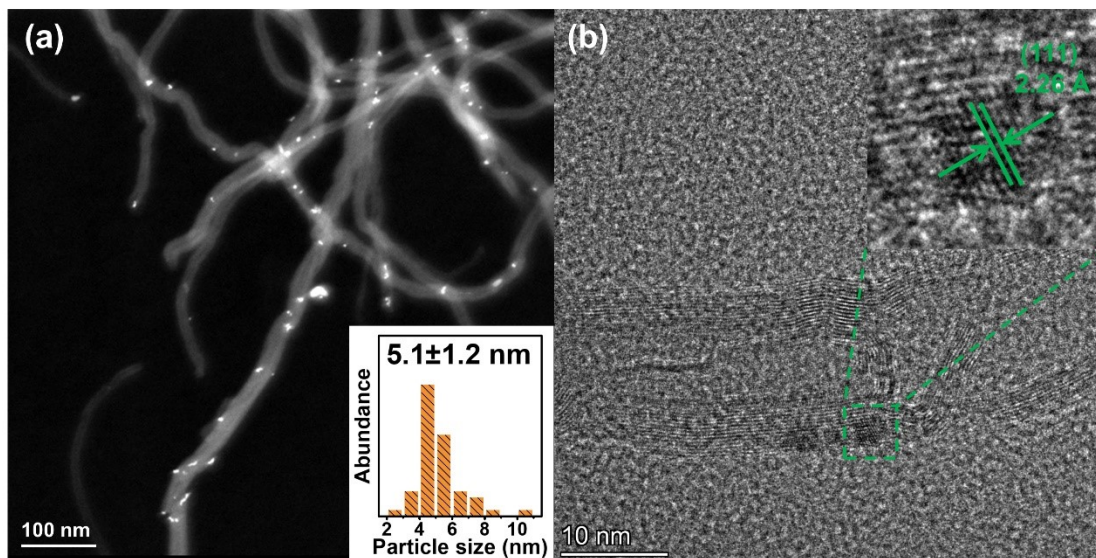

**Fig. S7** (a) STEM image and (b) TEM image of Pt/CNTs. The inset images correspond to the particle size distribution of catalyst and lattice fringe of Pt, respectively.

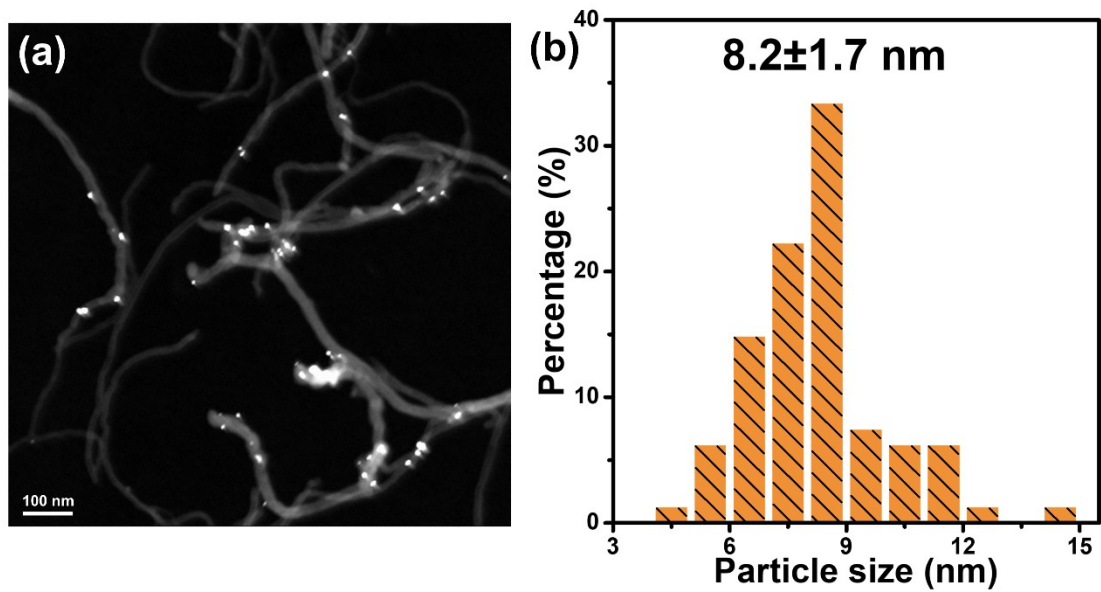

**Fig. S8** (a) STEM image and (b) the particle size distribution of PtSn<sub>0.5</sub>/CNTs-IM.

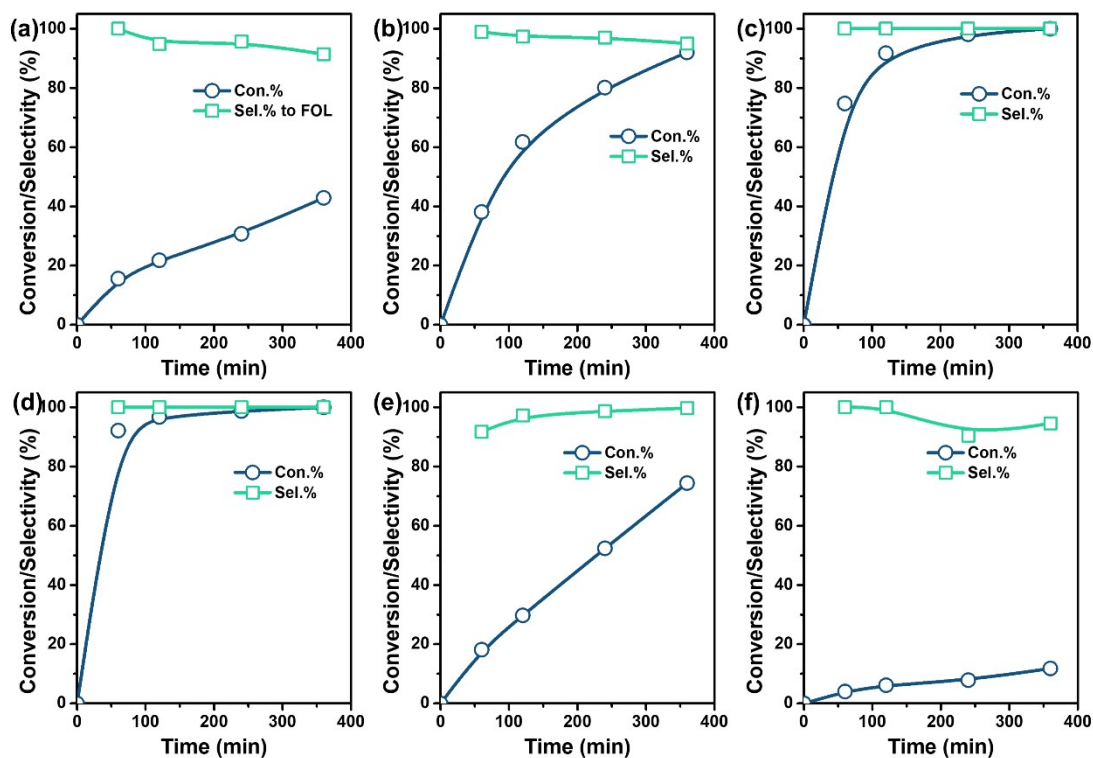

**Fig. S9** Variation of conversion and selectivity with reaction time for the hydrogenation of FAL over (a) Pt/CNTs, (b) PtSn<sub>0.2</sub>/CNTs-100, (c) PtSn<sub>0.33</sub>/CNTs-100, (d) PtSn<sub>0.5</sub>/CNTs-100, (e) PtSn<sub>1.0</sub>/CNTs-100, (f) PtSn<sub>2.0</sub>/CNTs-100. Reaction condition: 140 °C, 2 MPa, 1 h, THF as solvent, and 50 mg catalyst.

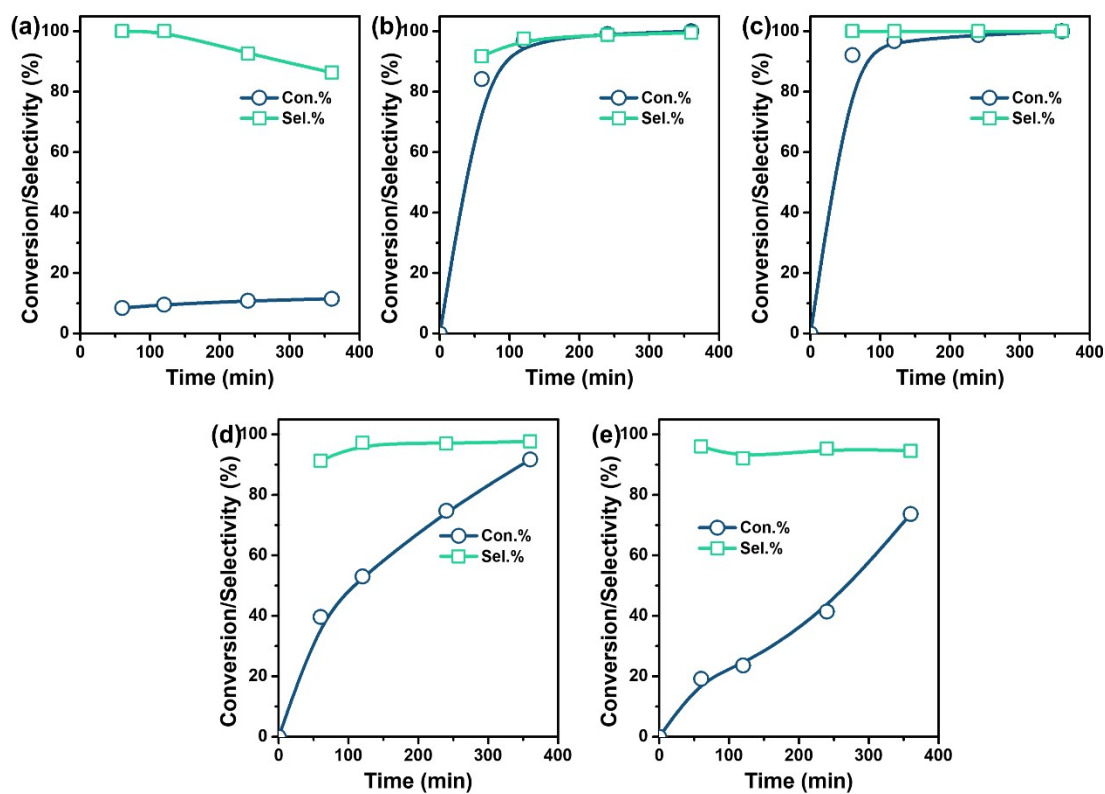

**Fig. S10** Variation of conversion and selectivity with reaction time for the hydrogenation of FAL over (a) PtSn<sub>0.5</sub>/CNTs-60, (b) PtSn<sub>0.5</sub>/CNTs-80, (c) PtSn<sub>0.5</sub>/CNTs-100, (d) PtSn<sub>0.5</sub>/CNTs-140, (e) PtSn<sub>0.5</sub>/CNTs-180. Reaction condition: 140 °C, 2 MPa, 1 h, THF as solvent, and 50 mg catalyst.

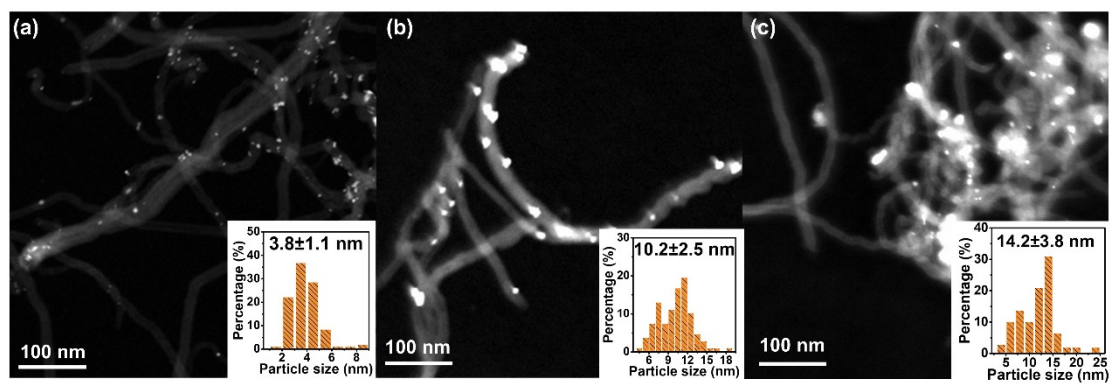

**Fig. S11** STEM images of PtSn<sub>0.5</sub>/CNTs-60, PtSn<sub>0.5</sub>/CNTs-140, and PtSn<sub>0.5</sub>/CNTs-180.

The inset images correspond to the particle size distribution.

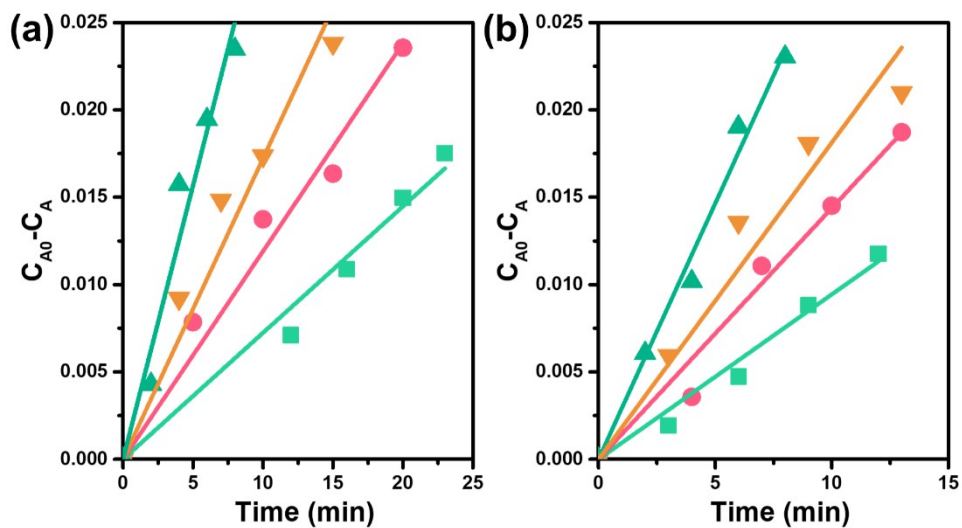

**Fig. S12** Fitting of the pseudo-zero-order kinetic model to the hydrogenation of FAL experimental data collected over (a) PtSn<sub>0.5</sub>/CNTs-100 and (b) Pt/CNTs-100.

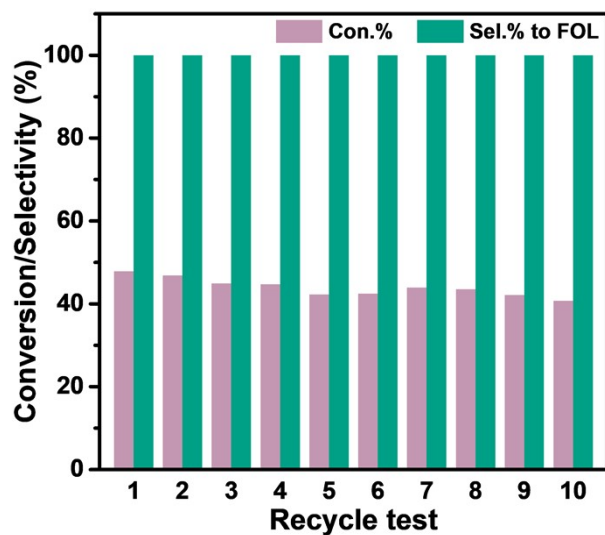

**Fig. S13** Stability test over PtSn<sub>0.5</sub>/CNTs-100 with low FAL conversion. Reaction conditions: 0.05 g catalyst, 80 °C, 2 MPa, H<sub>2</sub>O as solvent, and 50 min.

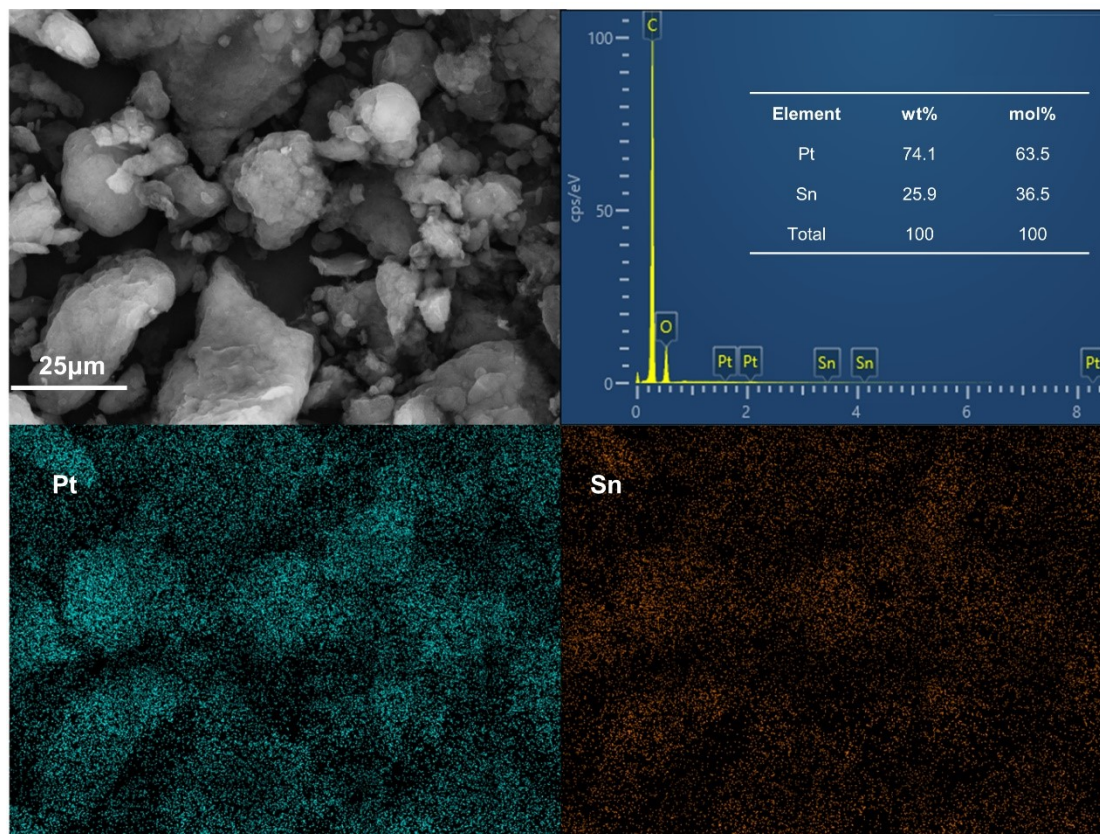

**Fig. S14** SEM image and the corresponding elemental EDX mapping of spent PtSn<sub>2.0</sub>/CNTs-100



## Reference

1. Á. O’driscoll, J. Leahy and T. Curtin, The influence of metal selection on catalyst activity for the liquid phase hydrogenation of furfural to furfuryl alcohol, *Catal. Today*, **2017**, 279, 194-201.
2. R. V. Maligal-Ganesh, C. Xiao, T. W. Goh, L.-L. Wang, J. Gustafson, Y. Pei, Z. Qi, D. D. Johnson, S. Zhang, F. Tao and W. Huang, A ship-in-a-bottle strategy to synthesize encapsulated intermetallic nanoparticle catalysts: exemplified for furfural hydrogenation. *ACS Catal.*, **2016**, 6, 1754-1763.
3. V. Vetere, A. B. Merlo, J. F. Ruggera and M. L. Casella, Transition metal-based bimetallic catalysts for the chemoselective hydrogenation of furfuraldehyde, *J. Braz. Chem. Soc.*, **2010**, 21, 914-920.
4. T. Xiao, P. Yan, K. Li, C. Yang, H. Yu, J. Wang, H. Yin and S. Zhou, Hollow Mesoporous Nanoreactors with Encaged PtSn Alloy Nanoparticles for Selective Hydrogenation of Furfural to Furfuryl Alcohol, *Ind. Eng. Chem. Res.*, **2021**, 60, 6078-6088.
5. A. i. O’Driscoll, T. Curtin, W. Y. Hernández, P. Van Der Voort and J. J. Leahy, Hydrogenation of furfural with a Pt–Sn catalyst: The suitability to sustainable industrial application, *Org. Process Res. Dev.*, **2016**, 20, 1917-1929.
6. B. Zhang, Y. Pei, R. V. Maligal-Ganesh, X. Li, A. Cruz, R. J. Spurling, M. Chen, J. Yu, X. Wu and W. Huang, Influence of Sn on stability and selectivity of Pt–Sn@UiO-66-NH<sub>2</sub> in furfural hydrogenation, *Ind. Eng. Chem. Res.*, **2020**, 59, 17495-17501.
